# Supplementary material for: A novel solid formulation of a rivaroxaban eutectic using a hot melt extruder with improved thermal stability and dissolution profile
Source: Royal Society of Chemistry journal article supplement (doi:10.1039/d4pm00253a), 2024-11-14
Supplement: d4pm00253a1.pdf [file d4pm00253a1.pdf]

## **Supplementary Information**

### **A novel solid formulation of rivaroxaban eutectic using a hot melt extruder with improved thermal stability and dissolution profile**

Parth S. Shaligram<sup>a, b</sup>, Ranjitsinh Pawar<sup>c</sup>, Nagabhushan Shet<sup>a, c</sup> and Rajesh G. Gonnade<sup>\*a, b</sup>

<sup>a</sup>Physical and Materials Chemistry Division, CSIR-National Chemical Laboratory, Dr. Homi Bhabha Road, Pashan, Pune, 411008 India; rg.gonnade@ncl.res.in; Fax: +91 20 25902642; Tel: +91 20 25902225

<sup>b</sup>Academy of Scientific and Innovative Research (AcSIR), Sector 19, Kamla Nehru Nagar, Ghaziabad, Uttar Pradesh 201002, India

<sup>c</sup>Poona College of Pharmacy, Bharati Vidyapeeth Deemed to be University, Erandwane, Pune-411038, Maharashtra, India

\*Correspondence: rg.gonnade@ncl.res.in; Fax: +91 20 25902642; Tel: +91 20 25902225

ORCID ID: 0000-0002-2841-0197

## Table of Contents

|                                                                                                                                                                       |    |
|-----------------------------------------------------------------------------------------------------------------------------------------------------------------------|----|
| <b>Figure S1.</b> DSC profiles of RXB-MA (1:4) eutectics were recorded after accelerated and long-term stability study conditions.....                                | 3  |
| <b>Figure S2.</b> PXRD was measured for eutectics after long-term stability studies.....                                                                              | 4  |
| <b>Figure S3.</b> DSC thermograms for extrusion batches of 10% RXB with different hydrophilic polymers. ....                                                          | 5  |
| <b>Figure S4.</b> FTIR overlay of polymer, plasticizer, physical mixture of all the components in the ASD and formulated ASD.....                                     | 6  |
| <b>Figure S5.</b> TGA profile of polymer Kollidon VA 64 .....                                                                                                         | 7  |
| <b>Figure S6.</b> DSC thermograms of a) Kolliphor® P 188 and b) Kollidon® VA 64 and physical mixture of polymer and plasticizer. ....                                 | 8  |
| <b>Figure S7.</b> Maximum possible eutectics loading with and without Kolliphor® P 188 as a plasticizer.....                                                          | 9  |
| <b>Figure S8.</b> PXRD overlay of RXB, RXB-MA (1:4) eutectic, RXB-MA (1:4) 25% ASD and sample holder suggesting conversion of crystalline form to amorphous form..... | 10 |
| <b>Table S1.</b> $2\theta$ peak positions for RXB, MA and RXB-MA eutectics. ....                                                                                      | 11 |

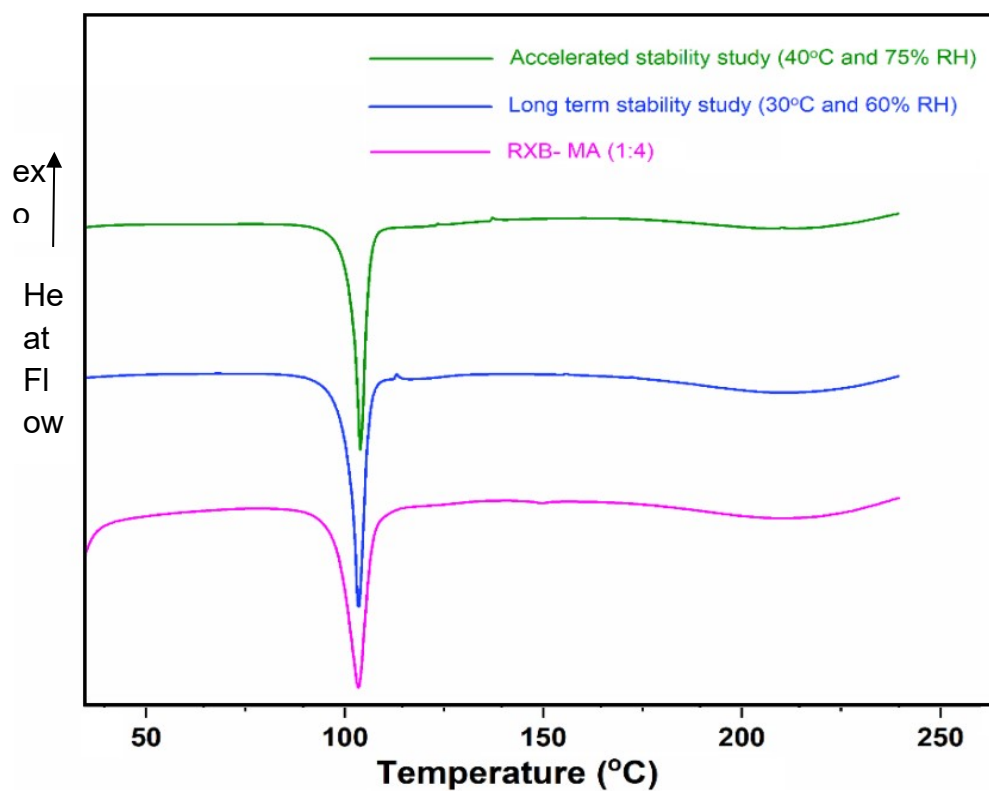

**Figure S1.** DSC profiles of RXB-MA (1:4) eutectics were recorded after accelerated and long-term stability study conditions.

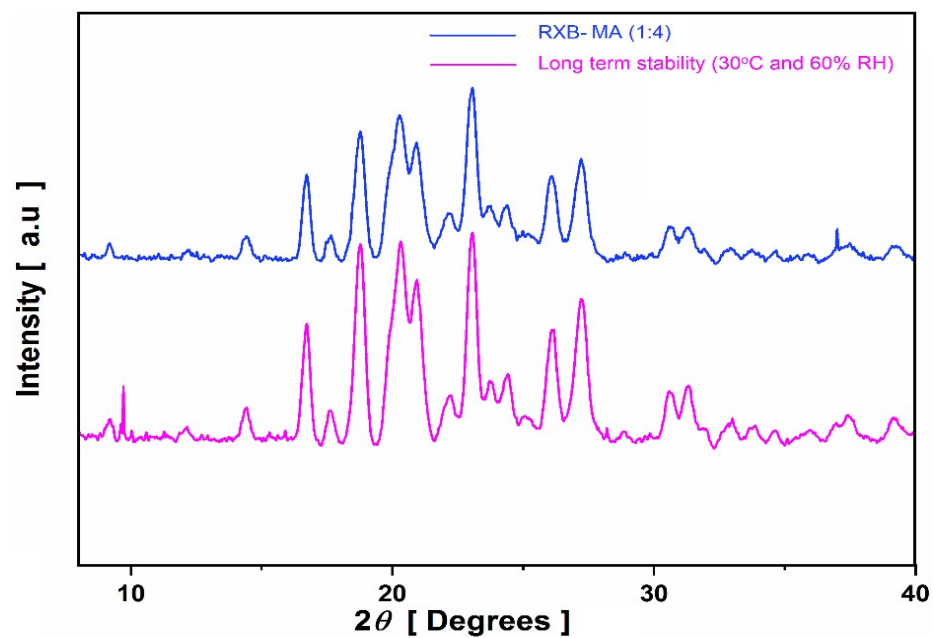

**Figure S2.** PXRD was measured for eutectics after long-term stability studies.

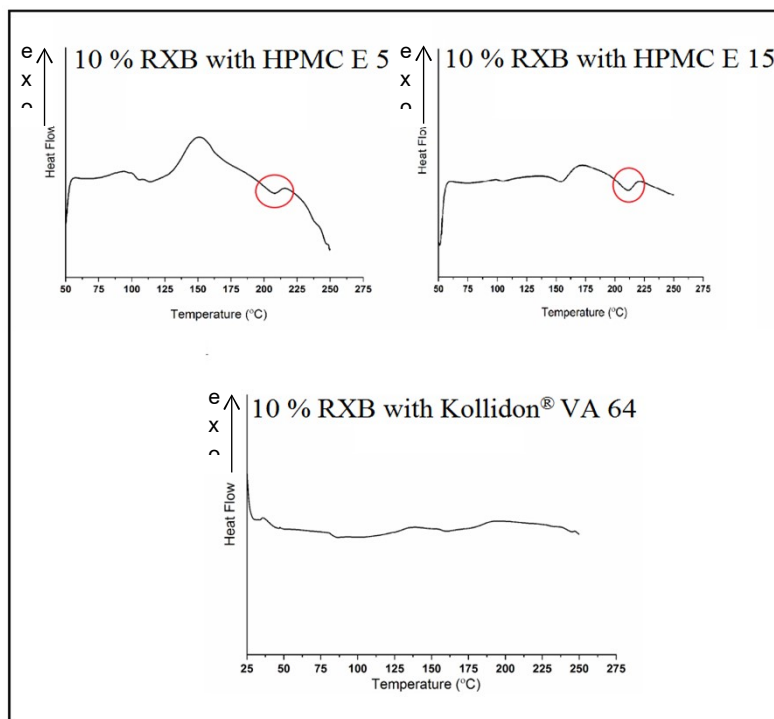

**Figure S3.** DSC thermograms for extrusion batches of 10% RXB with different hydrophilic polymers.

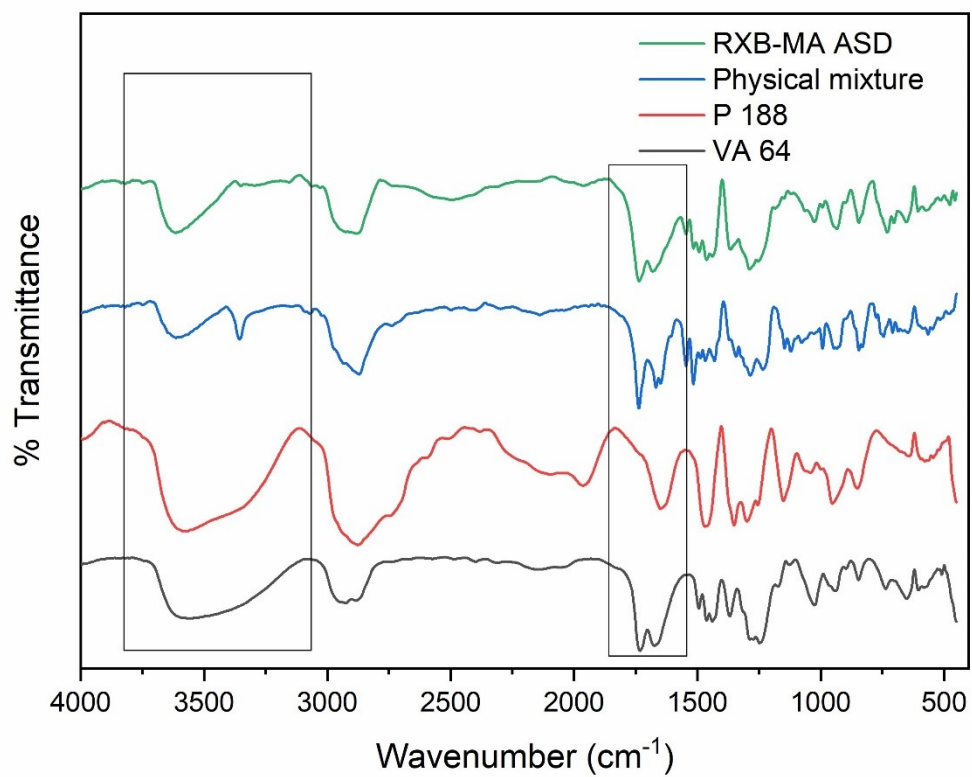

**Figure S4.** FTIR overlay of polymer, plasticizer, physical mixture of all the components in the ASD and formulated ASD.

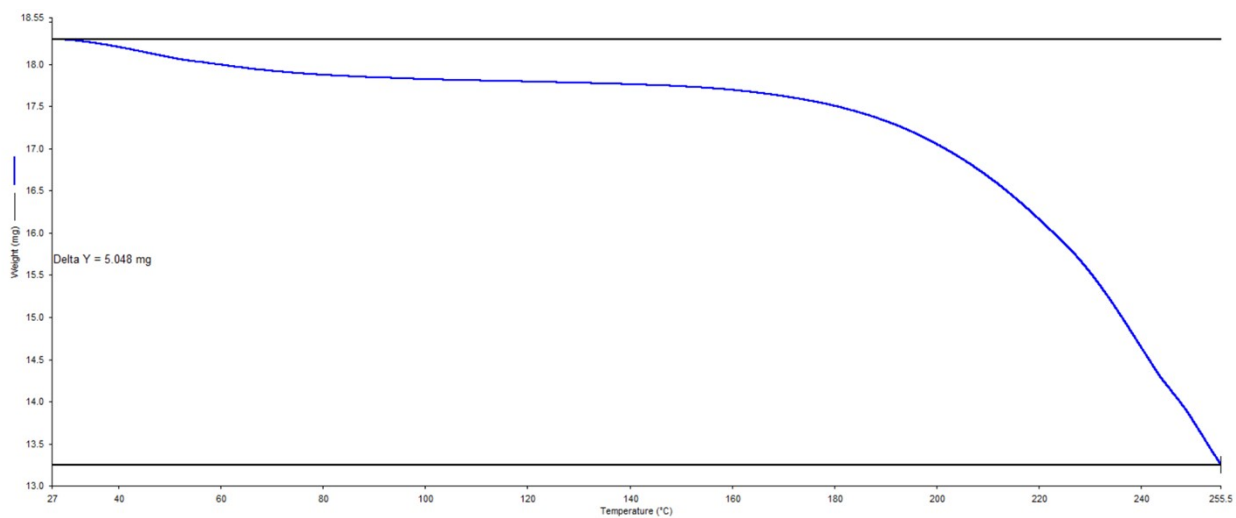

**Figure S5.** TGA profile of polymer Kollidon® VA 64

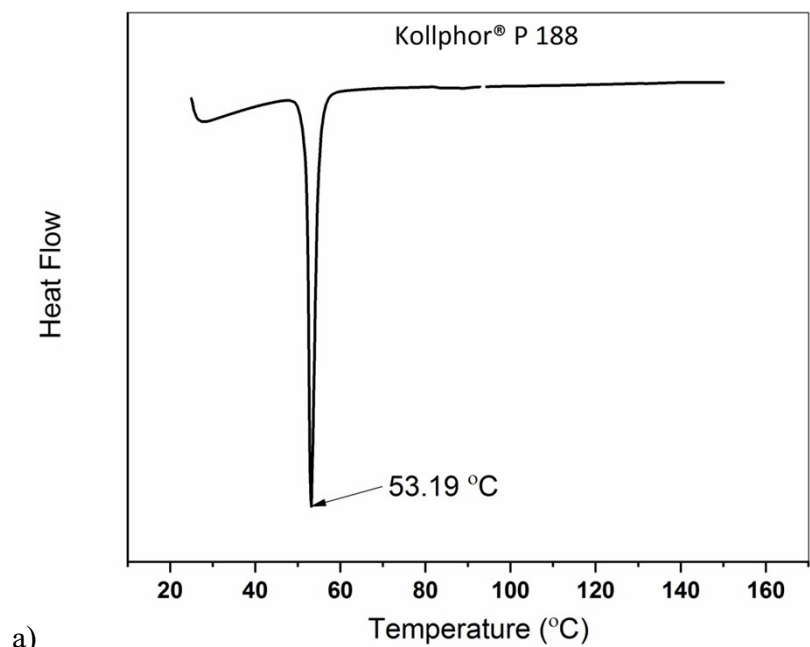

a)

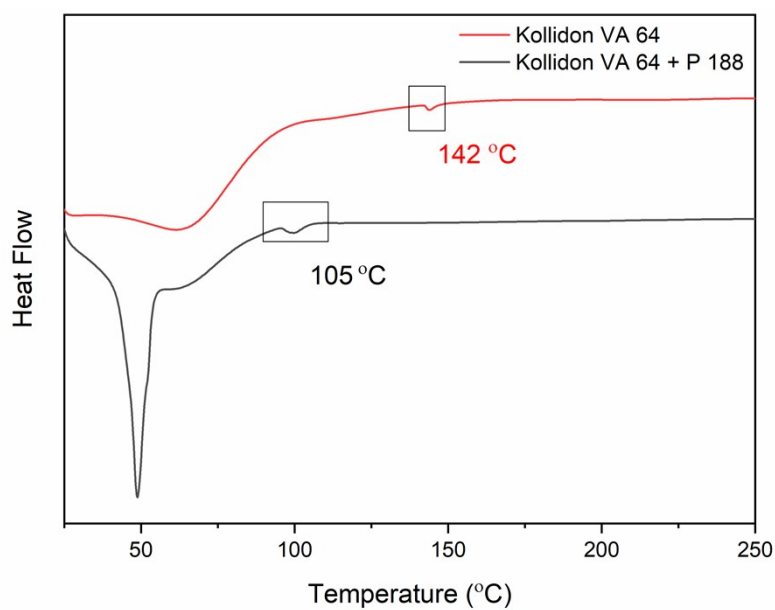

b)

**Figure S6.** DSC thermograms of a) Kolliphor® P 188 and b) Kollidon® VA 64 and physical mixture of polymer and plasticizer.

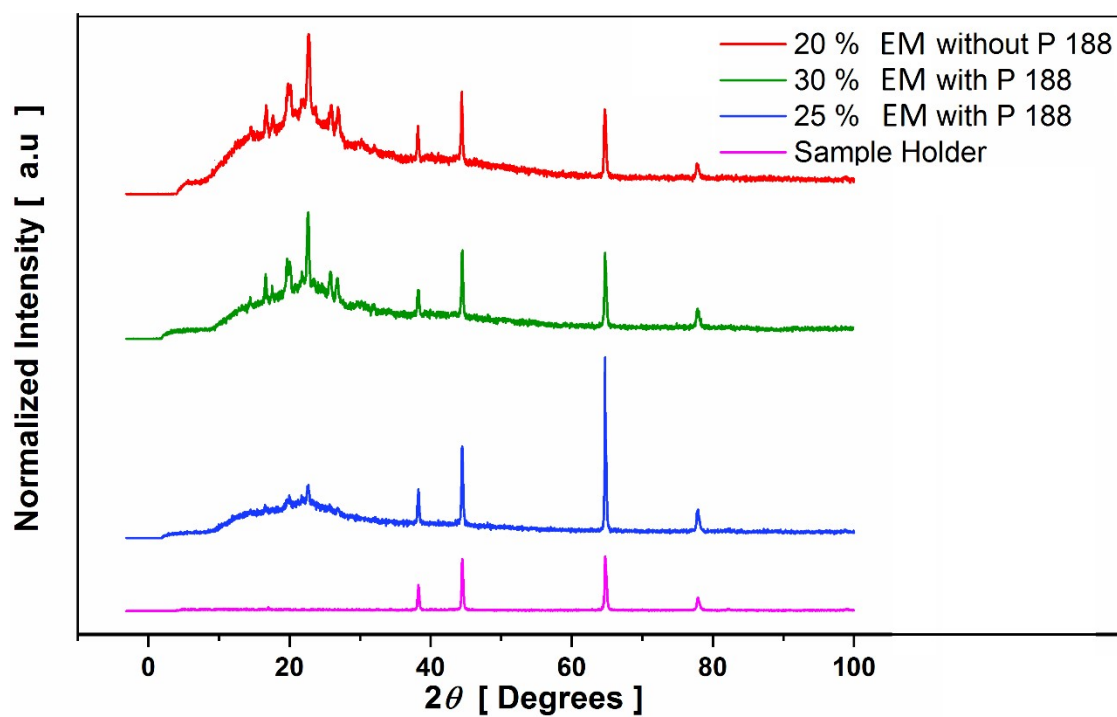

**Figure S7.** Maximum possible eutectics loading with and without Kolliphor® P 188 as a plasticizer.

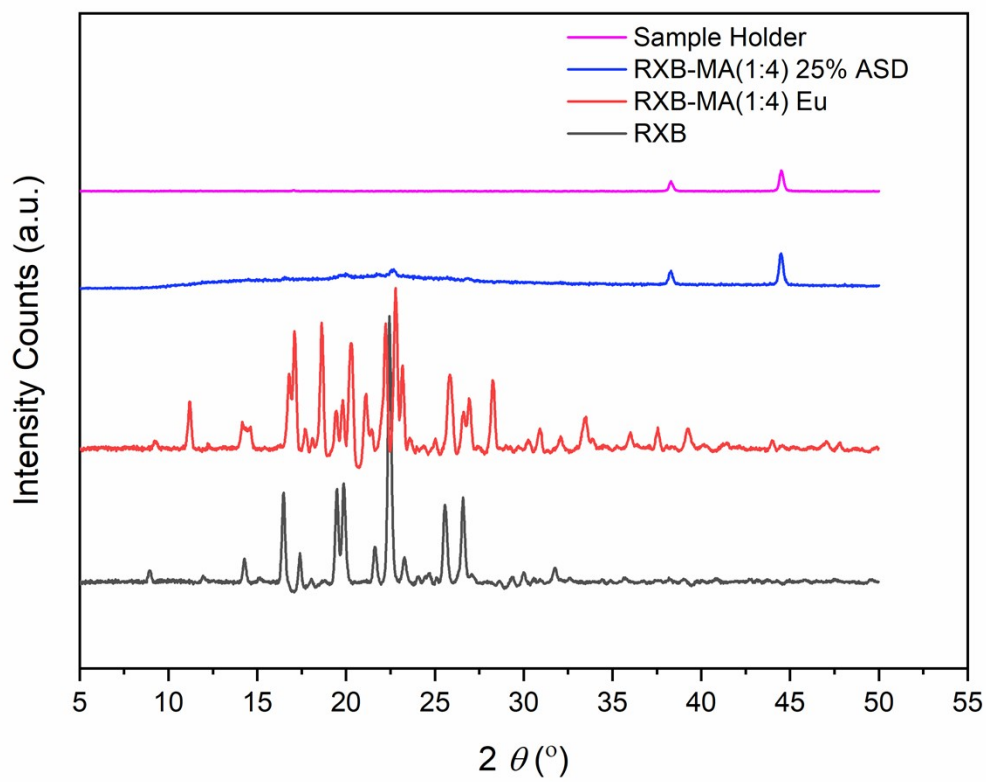

**Figure S8.** PXRD overlay of RXB, RXB-MA (1:4) eutectic, RXB-MA (1:4) 25% ASD and sample holder suggesting conversion of crystalline form to amorphous form.

**Table S1.**  $2\theta$  peak positions for RXB, MA and RXB-MA eutectics.

| RXB ( $2\theta$ ) | MA ( $2\theta$ ) | RXB- MA eutectic ( $2\theta$ ) |
|-------------------|------------------|--------------------------------|
| 16.25             | 11.13            | 11.15                          |
| 19.89             | 17.06            | 16.23                          |
| 22.5              | 18.03            | 17.02                          |
| 25.48             | 20.36            | 18.04                          |
| 26.96             | 22.41            | 20.31                          |
|                   | 22.97            | 22.45                          |
|                   | 26.08            | 22.53                          |
|                   | 33.13            | 23.01                          |
|                   |                  | 25.48                          |
|                   |                  | 26.05                          |
|                   |                  | 26.92                          |
|                   |                  | 33.08                          |
